# Supplementary material for: Design for Pandemic Information: Examining the Effect of Graphs on Anxiety and Social Distancing Intentions in the COVID-19
Source: Front Public Health. 2022 May 18;10:800789. doi: 10.3389/fpubh.2022.800789 (PMC9158495; doi:10.3389/fpubh.2022.800789)
Supplement: Supplementary file 1 [file Data_Sheet_1.CSV]

gender	age	edu	country	group	current_anxiety	anticipated_anxiety	overall_anxiety	social_distance	estimation_question
1	36	1	1	1	6	5	5.5	9	4
2	22	1	1	1	8	9	8.5	3	4
2	54	3	1	1	8	5	6.5	5	3
2	56	3	1	1	4	4	4	9	2
2	27	3	1	1	3	4	3.5	7	2
2	47	3	1	1	7	5	6	7	2
1	35	3	1	1	6	7	6.5	7	3
1	28	3	1	1	6	7	6.5	5	2
2	69	3	1	1	6	7	6.5	6	2
1	27	2	1	1	7	8	7.5	8	2
2	47	2	1	1	8	8	8	8	3
2	25	3	1	1	6	8	7	8	2
1	31	3	1	1	6	8	7	9	3
1	45	3	1	1	6	8	7	7	4
1	59	2	1	1	8	9	8.5	8	3
1	28	1	1	1	2	2	2	9	4
1	32	2	1	1	8	5	6.5	5	1
1	22	1	1	1	6	6	6	7	4
1	30	3	1	1	4	4	4	9	3
1	26	3	1	1	5	5	5	5	2
2	25	3	1	1	5	5	5	5	2
1	30	3	1	1	5	6	5.5	6	4
1	30	3	1	1	1	4	2.5	5	4
1	41	3	1	1	2	4	3	7	3
1	39	2	1	1	1	1	1	3	2
1	28	3	1	1	2	2	2	9	3
1	24	1	1	1	2	2	2	9	1
2	30	3	1	1	1	3	2	9	2
2	23	3	1	1	1	1	1	1	4
1	33	1	1	1	1	1	1	5	4
2	34	2	1	2	9	9	9	9	2
2	34	3	1	2	8	8	8	9	2
2	29	3	1	2	9	8	8.5	9	3
1	38	2	1	2	8	8	8	8	3
1	37	3	1	2	9	9	9	9	3
2	41	3	1	2	8	9	8.5	9	4
2	54	3	1	2	7	7	7	9	4
1	22	3	1	2	8	7	7.5	9	3
1	42	3	1	2	8	7	7.5	8	4
1	30	3	1	2	6	6	6	3	3
1	28	3	1	2	7	6	6.5	5	2
1	26	3	1	2	5	6	5.5	9	1
2	56	1	1	2	7	6	6.5	7	3
1	45	3	1	2	6	5	5.5	9	3
1	29	2	1	2	3	4	3.5	3	3
1	31	2	1	2	9	3	6	9	3
1	27	3	1	2	6	8	7	8	3
2	47	3	1	2	6	6	6	4	2
2	40	3	1	2	4	5	4.5	8	3
2	20	2	1	2	3	3	3	8	2
1	33	3	1	2	7	7	7	5	3
1	36	2	1	2	3	5	4	6	2
1	30	2	1	2	7	4	5.5	5	2
1	30	2	1	2	5	6	5.5	6	4
1	30	3	1	2	3	5	4	9	4
1	43	3	1	2	4	4	4	9	2
1	58	2	1	2	2	2	2	9	2
2	47	3	1	2	5	2	3.5	2	2
1	48	2	1	2	2	5	3.5	2	1
1	28	2	1	2	1	2	1.5	8	2
2	52	3	1	3	5	9	7	9	2
2	32	1	1	3	9	9	9	9	4
2	35	3	1	3	9	9	9	9	2
1	28	3	1	3	7	7	7	9	2
1	27	3	1	3	9	7	8	9	4
1	55	2	1	3	5	6	5.5	9	2
1	39	3	1	3	8	9	8.5	9	4
1	40	3	1	3	7	8	7.5	9	3
1	30	3	1	3	8	8	8	7	4
1	30	3	1	3	7	7	7	7	4
1	26	3	1	3	7	7	7	9	3
1	39	3	1	3	6	6	6	9	3
1	32	3	1	3	5	5	5	9	3
1	28	3	1	3	9	8	8.5	8	2
1	28	3	1	3	7	6	6.5	6	3
1	32	3	1	3	8	6	7	7	2
1	35	3	1	3	6	6	6	6	2
1	70	3	1	3	5	6	5.5	7	2
1	25	2	1	3	8	8	8	7	4
1	47	3	1	3	6	6	6	9	2
1	65	3	1	3	5	2	3.5	7	4
2	40	3	1	3	6	7	6.5	6	3
1	41	3	1	3	5	7	6	9	2
2	49	3	1	3	6	6	6	9	4
2	45	3	1	3	2	5	3.5	8	3
2	38	3	1	3	7	2	4.5	9	4
2	58	3	1	3	3	3	3	9	3
1	31	2	1	3	3	2	2.5	8	3
1	60	3	1	3	3	9	6	8	1
1	57	3	1	3	1	1	1	9	3
2	22	2	2	3	6	9	7.5	8	4
1	22	2	2	3	7	2	4.5	7	4
2	27	3	2	3	5	7	6	7	3
1	38	3	2	3	8	8	8	9	4
2	36	3	2	3	8	7	7.5	9	3
1	45	1	2	3	6	9	7.5	7	3
2	30	3	2	3	7	7	7	8	4
1	25	3	2	3	5	3	4	8	3
2	22	3	2	3	8	8	8	9	4
2	29	3	2	3	6	8	7	9	4
1	40	1	2	3	5	8	6.5	8	2
1	26	2	2	3	8	9	8.5	7	3
1	25	2	2	3	8	7	7.5	9	4
1	44	3	2	3	6	9	7.5	8	2
2	37	2	2	3	8	7	7.5	9	4
1	21	3	2	3	8	8	8	9	4
2	22	3	2	3	5	8	6.5	8	3
2	27	3	2	3	6	5	5.5	7	4
1	22	3	2	3	6	9	7.5	7	2
1	21	3	2	3	7	8	7.5	8	2
2	41	3	2	3	8	8	8	9	4
2	23	3	2	3	8	8	8	9	2
2	43	1	2	3	6	5	5.5	8	3
1	21	2	2	3	8	8	8	9	4
2	25	2	2	3	9	9	9	9	2
2	27	2	2	3	9	8	8.5	8	1
2	28	2	2	3	8	5	6.5	9	4
2	29	2	2	3	8	8	8	9	3
2	24	3	2	3	7	9	8	9	4
2	19	2	2	3	5	9	7	9	3
2	19	2	2	2	5	8	6.5	9	2
1	19	2	2	2	5	8	6.5	7	3
2	18	2	2	2	8	7	7.5	8	3
2	31	2	2	2	6	6	6	8	4
1	28	3	2	2	7	8	7.5	8	2
1	46	1	2	2	5	6	5.5	7	3
1	35	2	2	2	6	6	6	8	4
2	21	2	2	2	7	9	8	8	3
1	27	2	2	2	8	6	7	8	2
1	26	3	2	2	7	5	6	8	2
2	24	2	2	2	6	8	7	7	4
2	34	2	2	2	5	5	5	8	3
1	24	2	2	2	6	6	6	7	4
2	28	2	2	2	3	4	3.5	7	3
2	33	2	2	2	5	9	7	8	4
2	28	3	2	2	5	8	6.5	8	2
2	25	2	2	2	7	8	7.5	8	3
2	29	2	2	2	5	4	4.5	7	2
1	26	2	2	2	6	7	6.5	8	4
1	47	2	2	2	5	7	6	7	3
1	27	2	2	2	5	8	6.5	8	3
2	26	2	2	2	7	6	6.5	8	4
1	27	2	2	2	6	9	7.5	8	3
1	23	2	2	2	5	7	6	8	2
1	49	1	2	2	7	6	6.5	9	4
2	21	2	2	2	6	8	7	8	2
2	33	2	2	2	5	5	5	7	3
2	31	2	2	2	6	6	6	8	2
1	47	2	2	2	5	5	5	7	3
2	29	2	2	2	4	8	6	7	1
2	29	2	2	1	7	9	8	9	3
1	28	2	2	1	6	7	6.5	9	2
1	30	2	2	1	7	6	6.5	7	2
2	26	3	2	1	6	5	5.5	8	3
1	21	2	2	1	7	3	5	7	2
1	24	2	2	1	6	6	6	8	1
2	20	2	2	1	6	2	4	8	3
1	34	3	2	1	5	3	4	7	2
1	37	3	2	1	4	8	6	8	2
1	27	2	2	1	6	5	5.5	6	2
1	35	2	2	1	4	2	3	5	4
2	24	2	2	1	6	3	4.5	7	3
1	36	2	2	1	1	2	1.5	4	3
1	27	2	2	1	5	6	5.5	8	4
1	31	3	2	1	6	8	7	9	3
2	42	3	2	1	7	9	8	8	4
1	24	2	2	1	6	2	4	7	2
2	28	2	2	1	5	5	5	8	2
1	26	2	2	1	7	8	7.5	7	3
1	28	2	2	1	8	4	6	7	3
1	32	2	2	1	5	5	5	7	3
2	33	2	2	1	6	8	7	7	1
1	31	2	2	1	4	1	2.5	7	2
2	40	1	2	1	4	4	4	8	2
1	32	2	2	1	6	8	7	6	2
2	37	3	2	1	4	9	6.5	7	3
1	35	3	2	1	5	4	4.5	8	1
1	33	3	2	1	7	4	5.5	8	3
2	36	2	2	1	4	7	5.5	7	2
1	34	3	2	1	4	4	4	6	1
